# Supplementary material for: Vinyl ethers and epoxides photoinduced copolymerization with perfluoropolyalkylether monomers
Source: Springer Nature journal article supplement (doi:10.1007/s00396-020-04723-3), 2020-09-09
Supplement: MOESM1 [file 396_2020_4723_MOESM1_ESM.pdf]

ISTITUTO NAZIONALE DI RICERCA METROLOGICA  
Repository Istituzionale

Vinyl ethers and epoxides photoinduced copolymerization with perfluoropolyalkylether monomers

This is the author's submitted version of the contribution published as:

*Original*

Vinyl ethers and epoxides photoinduced copolymerization with perfluoropolyalkylether monomers / Trusiano, G.; Vitale, A.; Bonneaud, C.; Pugliese, D.; Dalle Vacche, S.; Joly-Duhamel, C.; Friesen, C. M.; Bongiovanni, R.. - In: COLLOID AND POLYMER SCIENCE. - ISSN 0303-402X. - 299:(2021), pp. 509-521. [10.1007/s00396-020-04723-3]

*Availability:*

This version is available at: 11696/77369 since:

*Publisher:*

Springer

*Published*

DOI:10.1007/s00396-020-04723-3

*Terms of use:*

This article is made available under terms and conditions as specified in the corresponding bibliographic description in the repository

*Publisher copyright*

(Article begins on next page)

## Supporting Information

# Vinyl ethers and epoxides photoinduced copolymerization with perfluoropolyalkylether monomers

*Giuseppe Trusiano,<sup>†,\*</sup> Alessandra Vitale,<sup>†,\*</sup> Céline Bonneaud,<sup>‡</sup> Diego Pugliese,<sup>†</sup> Sara Dalle Vacche<sup>†</sup>,  
Christine Joly-Duhamel,<sup>‡</sup> Chadron M. Friesen,<sup>§</sup> Roberta Bongiovanni<sup>†</sup>*

<sup>†</sup> Department of Applied Science and Technology , Politecnico di Torino, Corso Duca degli Abruzzi 24,  
10129 Torino, Italy

<sup>‡</sup> Institut Charles Gerhardt Montpellier , University of Montpellier, CNRS, ENSCM, Cedex 5,  
34296 Montpellier, France

<sup>§</sup> Department of Chemistry, Trinity Western University, 7600 Glover Road, V2Y 1Y1 Langley, BC, Canada

\* Corresponding authors: [giuseppe.trusiano@polito.it](mailto:giuseppe.trusiano@polito.it) ; [alessandra.vitale@polito.it](mailto:alessandra.vitale@polito.it)

## List of Figures

|                                                                                                              |   |
|--------------------------------------------------------------------------------------------------------------|---|
| Fig. S1 ATR FT-IR spectra of the PFPAE-EGVE + TVE copolymer:.....                                            | 3 |
| Fig. S2 ATR FT-IR spectra of the PFPAE-BGVE + TVE copolymer: .....                                           | 3 |
| Fig. S3 ATR FT-IR spectra of the PFPAE-DEGVE + TVE copolymer: .....                                          | 4 |
| Fig. S4 ATR FT-IR spectra of the PFPAE-MO + TGE copolymer: .....                                             | 4 |
| Fig. S5 ATR FT-IR spectra of the PFPAE-EO + TGE copolymer: .....                                             | 5 |
| Fig. S6 ATR FT-IR spectra of the PFPAE-PO + TGE copolymer: .....                                             | 5 |
| Fig. S7 Water contact angle hysteresis measurements, on air and glass sides, of the UV-cured copolymers: ... | 7 |

## List of Tables

|                                                                                                                                                                                                                                                        |   |
|--------------------------------------------------------------------------------------------------------------------------------------------------------------------------------------------------------------------------------------------------------|---|
| Table S1 Number of repeat units, average molecular weight ( $M_n$ ), difunctional content, (from $^{19}\text{F}$ -NMR spectra) of the functionalized PFPAE monomers, and composition details and fluorine content of the investigated copolymers. .... | 6 |
| Table S2 Degradation temperatures of the UV-cured hydrogenated resins and copolymers.....                                                                                                                                                              | 7 |

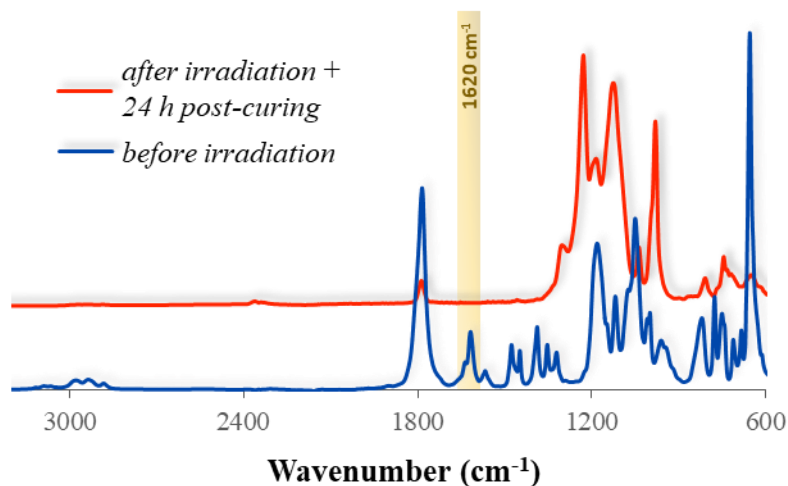

**Fig. S1** ATR FT-IR spectra of the PFPAE-EGVE + TVE copolymer:

**R<sub>h</sub>**: peak  $\sim 1780\text{ cm}^{-1}$  C=O bond;  $\sim 1620\text{ cm}^{-1}$  C=C; peak  $\sim 1100\text{ cm}^{-1}$  C-O-C ethers;

**R<sub>f</sub>**: peak  $\sim 1240\text{ cm}^{-1}$  stretching C-F bond, and peak  $\sim 1100\text{ cm}^{-1}$  C-O-C ethers;

**Photoinitiator**: peak  $\sim 2950\text{ cm}^{-1}$  stretching C=C-H; peak  $\sim 1780\text{ cm}^{-1}$  C=O bond; peak  $\sim 1600\text{-}1320\text{ cm}^{-1}$  C<sub>6</sub>H<sub>6</sub> bonds; peak  $\sim 1100\text{ cm}^{-1}$  C-O-C ethers

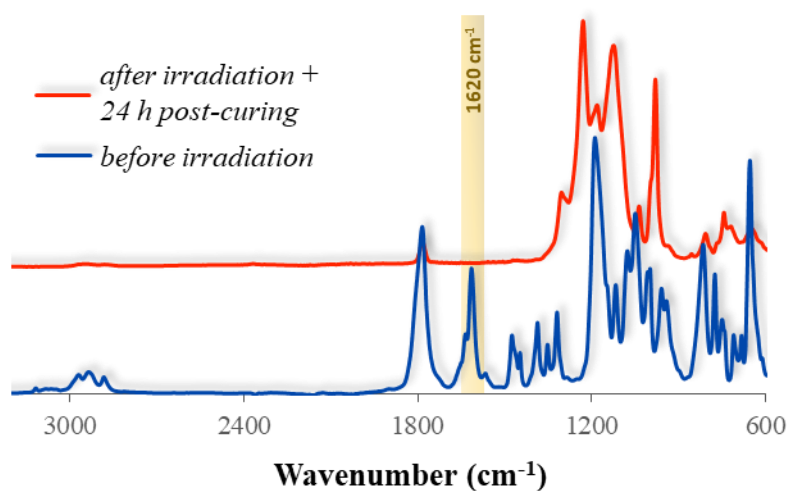

**Fig. S2** ATR FT-IR spectra of the PFPAE-BGVE + TVE copolymer:

**R<sub>h</sub>**: peak  $\sim 1780\text{ cm}^{-1}$  C=O bond;  $\sim 1620\text{ cm}^{-1}$  C=C; peak  $\sim 1100\text{ cm}^{-1}$  C-O-C ethers;

**R<sub>f</sub>**: peak  $\sim 1240\text{ cm}^{-1}$  stretching C-F bond, and peak  $\sim 1100\text{ cm}^{-1}$  C-O-C ethers;

**Photoinitiator**: peak  $\sim 2950\text{ cm}^{-1}$  stretching C=C-H; peak  $\sim 1780\text{ cm}^{-1}$  C=O bond; peak  $\sim 1600\text{-}1320\text{ cm}^{-1}$  C<sub>6</sub>H<sub>6</sub> bonds; peak  $\sim 1100\text{ cm}^{-1}$  C-O-C ethers

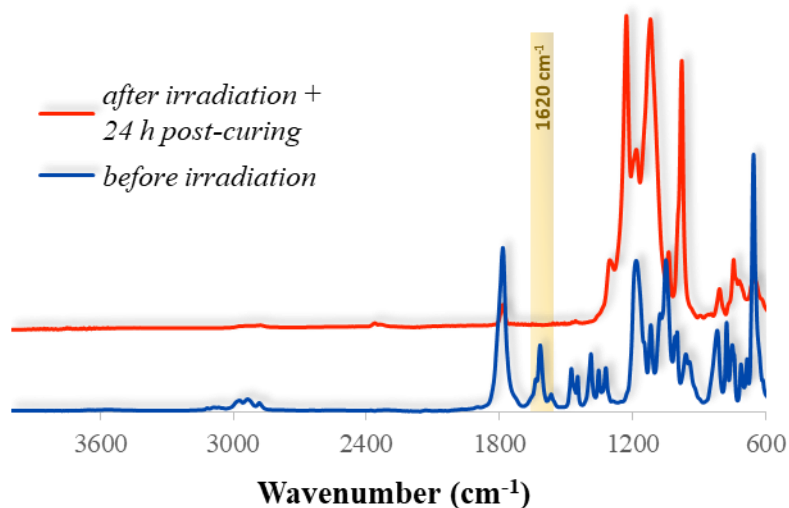

**Fig. S3** ATR FT-IR spectra of the PFPAE-DEGVE + TVE copolymer:

**R<sub>h</sub>**: peak  $\sim 1780\text{ cm}^{-1}$  C=O bond;  $\sim 1620\text{ cm}^{-1}$  C=C; peak  $\sim 1100\text{ cm}^{-1}$  C-O-C ethers;

**R<sub>f</sub>**: peak  $\sim 1240\text{ cm}^{-1}$  stretching C-F bond, and peak  $\sim 1100\text{ cm}^{-1}$  C-O-C ethers;

**Photoinitiator**: peak  $\sim 2950\text{ cm}^{-1}$  stretching C=C-H; peak  $\sim 1780\text{ cm}^{-1}$  C=O bond; peak  $\sim 1600\text{-}1320\text{ cm}^{-1}$  C<sub>6</sub>H<sub>6</sub> bonds; peak  $\sim 1100\text{ cm}^{-1}$  C-O-C ethers

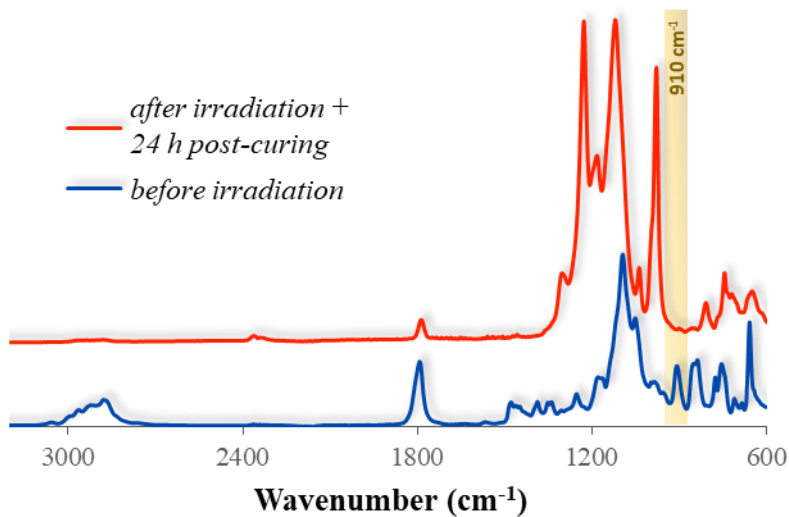

**Fig. S4** ATR FT-IR spectra of the PFPAE-MO + TGE copolymer:

**R<sub>h</sub>**: peak  $\sim 1780\text{ cm}^{-1}$  C=O bond;  $\sim 1620\text{ cm}^{-1}$  C=C; peak  $\sim 1100\text{ cm}^{-1}$  C-O-C ethers; peak  $\sim 910\text{ cm}^{-1}$  epoxides;

**R<sub>f</sub>**: peak  $\sim 1240\text{ cm}^{-1}$  stretching C-F bond, and peak  $\sim 1100\text{ cm}^{-1}$  C-O-C ethers;

**Photoinitiator**: peak  $\sim 2950\text{ cm}^{-1}$  stretching C=C-H; peak  $\sim 1780\text{ cm}^{-1}$  C=O bond; peak  $\sim 1600\text{-}1320\text{ cm}^{-1}$  C<sub>6</sub>H<sub>6</sub> bonds; peak  $\sim 1100\text{ cm}^{-1}$  C-O-C ethers

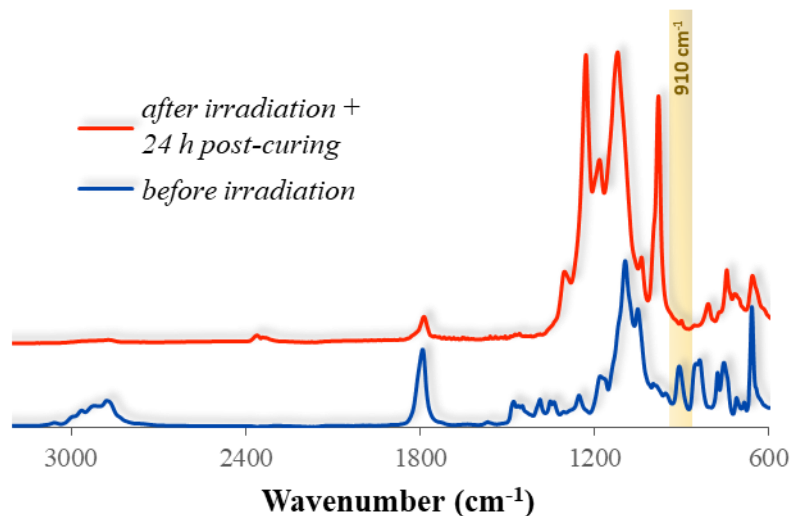

**Fig. S5** ATR FT-IR spectra of the PFPAE-EO + TGE copolymer:

**R<sub>h</sub>**: peak  $\sim 1780\text{ cm}^{-1}$  **C=O** bond;  $\sim 1620\text{ cm}^{-1}$  **C=C**; peak  $\sim 1100\text{ cm}^{-1}$  **C-O-C** ethers; peak  $\sim 910\text{ cm}^{-1}$  **epoxides**;

**R<sub>f</sub>**: peak  $\sim 1240\text{ cm}^{-1}$  stretching **C-F** bond, and peak  $\sim 1100\text{ cm}^{-1}$  **C-O-C** ethers;

**Photoinitiator**: peak  $\sim 2950\text{ cm}^{-1}$  stretching **C=C-H**; peak  $\sim 1780\text{ cm}^{-1}$  **C=O** bond; peak  $\sim 1600\text{-}1320\text{ cm}^{-1}$  **C<sub>6</sub>H<sub>6</sub>** bonds; peak  $\sim 1100\text{ cm}^{-1}$  **C-O-C** ethers

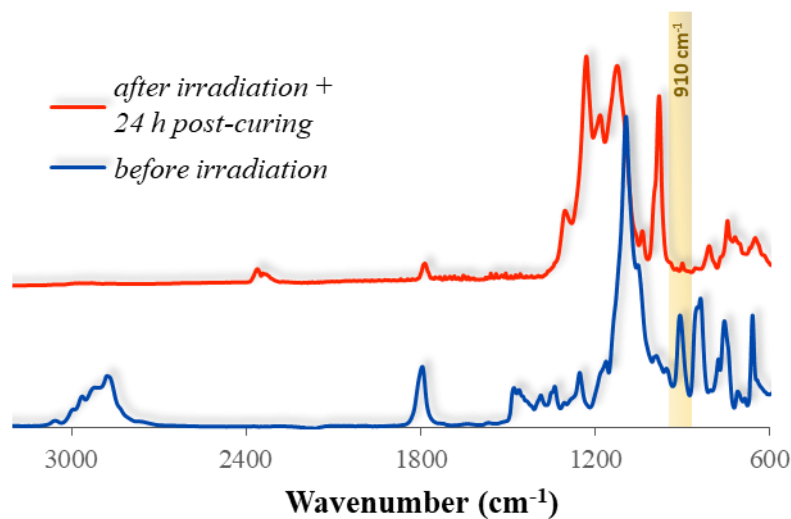

**Fig. S6** ATR FT-IR spectra of the PFPAE-PO + TGE copolymer:

**R<sub>h</sub>**: peak  $\sim 1780\text{ cm}^{-1}$  **C=O** bond;  $\sim 1620\text{ cm}^{-1}$  **C=C**; peak  $\sim 1100\text{ cm}^{-1}$  **C-O-C** ethers; peak  $\sim 910\text{ cm}^{-1}$  **epoxides**;

**R<sub>f</sub>**: peak  $\sim 1240\text{ cm}^{-1}$  stretching **C-F** bond, and peak  $\sim 1100\text{ cm}^{-1}$  **C-O-C** ethers;

**Photoinitiator**: peak  $\sim 2950\text{ cm}^{-1}$  stretching **C=C-H**; peak  $\sim 1780\text{ cm}^{-1}$  **C=O** bond; peak  $\sim 1600\text{-}1320\text{ cm}^{-1}$  **C<sub>6</sub>H<sub>6</sub>** bonds; peak  $\sim 1100\text{ cm}^{-1}$  **C-O-C** ethers

**Table S1** Number of repeat units, average molecular weight ( $M_n$ ), difunctional content, (from  $^{19}\text{F}$ -NMR spectra) of the functionalized PFPAE monomers, and composition details and fluorine content of the investigated copolymers.

| Copolymer         | $m$ | PFPAE molecular weight (g/mol) | PFPAE difunctional content (mol%) | PFPAE/Resin weight ratio | F content in copolymer (wt%) | F content in copolymer (mol%) |
|-------------------|-----|--------------------------------|-----------------------------------|--------------------------|------------------------------|-------------------------------|
| PFPAE-EGVE + TVE  | 6   | 1740                           | 56                                | 0.32                     | 18.45                        | 0.97                          |
| PFPAE-BGVE + TVE  | 8   | 2130                           | 88                                | 0.32                     | 18.93                        | 1.00                          |
| PFPAE-DEGVE + TVE | 7   | 2000                           | 43                                | 0.32                     | 16.46                        | 0.87                          |
| PFPAE-MO + TGE    | 12  | 2720                           | 63                                | 0.32                     | 17.06                        | 0.90                          |
| PFPAE-EO + TGE    | 8   | 2130                           | 41                                | 0.32                     | 16.06                        | 0.85                          |
| PFPAE-PO + TGE    | 10  | 2530                           | 58                                | 0.32                     | 16.08                        | 0.85                          |

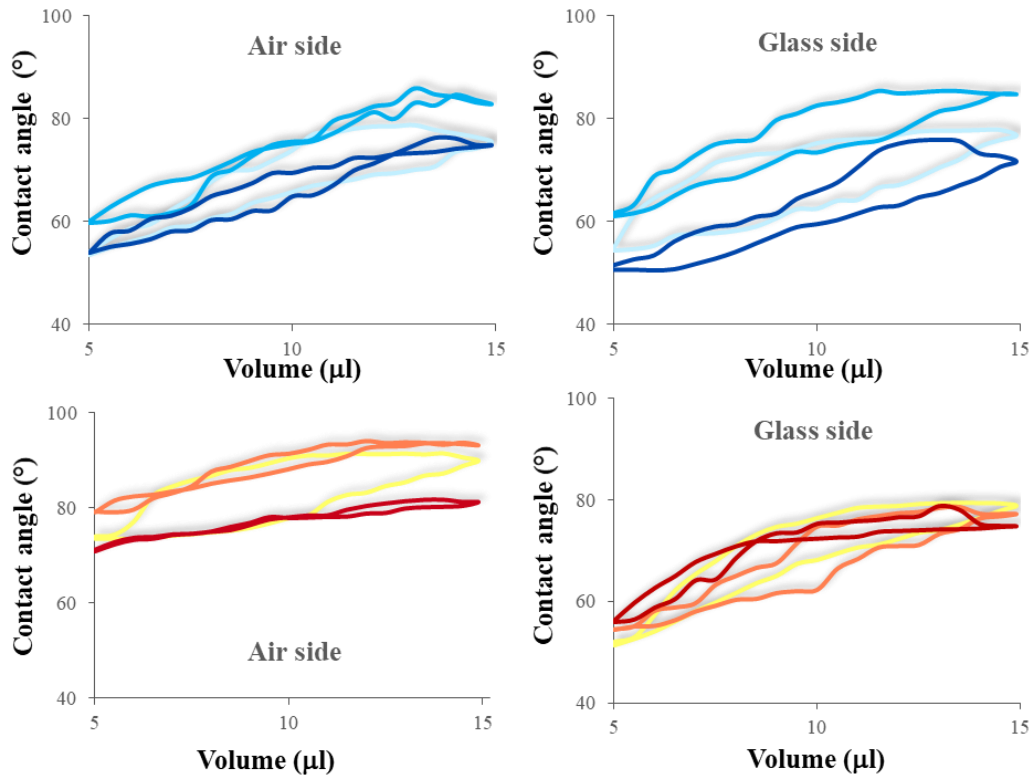

**Fig. S7** Water contact angle hysteresis measurements, on air and glass sides, of the UV-cured copolymers:

— PFPAE-EGVE + TVE, — PFPAE-BGVE + TVE, — PFPAE-DEGVE + TVE,  
— PFPAE-MO + TGE, — PFPAE-EO + TGE, — PFPAE-PO + TGE.

**Table S2** Degradation temperatures of the UV-cured hydrogenated resins and copolymers

| System            | T <sub>onset</sub> (°C) | T <sub>max1</sub> (°C) | T <sub>max2</sub> (°C) | T <sub>90%</sub> (°C) |
|-------------------|-------------------------|------------------------|------------------------|-----------------------|
| TVE               | 188                     | -                      | 398                    | 428                   |
| PFPAE-EGVE + TVE  | 137                     | 181                    | 397                    | 427                   |
| PFPAE-BGVE + TVE  | 150                     | 192                    | 366                    | 429                   |
| PFPAE-DEGVE + TVE | 136                     | 182                    | 375                    | 429                   |
| TGE               | 185                     | -                      | 378                    | 405                   |
| PFPAE-MO + TGE    | 130                     | 156                    | 381                    | 413                   |
| PFPAE-EO + TGE    | 132                     | 159                    | 361                    | 410                   |
| PFPAE-PO + TGE    | 140                     | 159                    | 385                    | 413                   |
